1 Increased expression of mitochondrial dysfunction stimulon genes  
2 affects chloroplast redox status and photosynthetic electron transfer  
3 in Arabidopsis

4 Alexey Shapiguzov<sup>1,2,3</sup>, Lauri Nikkanen<sup>4\*</sup>, Duncan Fitzpatrick<sup>4\*</sup>, Julia P. Vainonen<sup>1,2,5</sup>, Arjun  
5 Tiwari<sup>4</sup>, Richard Gossens<sup>1,2</sup>, Saleh Alseekh<sup>6,7</sup>, Fayeze Aarabi<sup>6</sup>, Olga Blokhina<sup>1,2</sup>, Klará  
6 Panzarová<sup>8</sup>, Zuzana Benedikty<sup>8</sup>, Esa Tyystjärvi<sup>4</sup>, Alisdair R. Fernie<sup>6,7</sup>, Martin Trtúlek<sup>8</sup>, Eva-Mari  
7 Aro<sup>4</sup>, Eevi Rintamäki<sup>4</sup>, and Jaakko Kangasjärvi<sup>1,2</sup>.

8 Author affiliations

9 <sup>1</sup>. Organismal and Evolutionary Biology Research Programme, Faculty of Biological and  
10 Environmental Sciences, University of Helsinki, FI-00014 Helsinki, Finland.

11 <sup>2</sup>. Viikki Plant Science Center, University of Helsinki, FI-00014 Helsinki, Finland.

12 <sup>3</sup>. Permanent address: Institute of Plant Physiology, Russian Academy of Sciences, 127276  
13 Moscow, Russia.

14 <sup>4</sup>. Department of Biochemistry / Molecular Plant Biology, University of Turku, FI-20014 Turku,  
15 Finland.

16 <sup>5</sup>. Current address: Turku Bioscience Centre, University of Turku, FI-20014 Turku, Finland.

17 <sup>6</sup>. Max-Planck Institute for Molecular Plant Physiology, D-14476 Potsdam-Golm, Germany.

18 <sup>7</sup>. Center of Plant Systems Biology and Biotechnology, 4000 Plovdiv, Bulgaria.

19 <sup>8</sup>. Photon Systems Instruments, 664 24 Drásov, Czech Republic.

20

21 \* These authors contributed equally to the manuscript.

22 Author for correspondence: Alexey Shapiguzov. E-mail: alexey.shapiguzov@helsinki.fi

## 23 Abstract

24 Mitochondrial retrograde signals control expression of nuclear mitochondrial dysfunction stimulon  
25 (MDS) genes. Although MDS gene products mostly affect mitochondrial functions, they also  
26 influence production of reactive oxygen species (ROS) and redox status of chloroplasts. To study  
27 this inter-organellar interaction, we analysed the response of the Arabidopsis MDS-overexpressor  
28 mutant *rcdl* to methyl viologen (MV), which catalyses electron transfer from Photosystem I (PSI)  
29 to molecular oxygen, generating ROS in Mehler's reaction. The response of plants to MV was  
30 investigated by imaging chlorophyll fluorescence in aerobic and hypoxic environments, and by  
31 membrane inlet mass spectrometry. Hypoxic treatment abolished the effect of MV on  
32 photosynthetic electron transfer in *rcdl*, but not in wild type. A similar reaction to hypoxia was  
33 observed in other MDS-activating lines and treatments. This suggests that MDS gene products  
34 contribute to oxygen depletion at the PSI electron-acceptor side. In unstressed growth conditions  
35 this MDS-related effect is likely masked by endogenous oxygen evolution and gas exchange with  
36 the atmosphere. In *rcdl*, altered Mehler's reaction coincided with more reduced state of the  
37 chloroplast NADPH-thioredoxin oxidoreductase C (NTRC) and its targets, suggesting that NTRC  
38 performs feedback control of photosynthesis. This regulation may represent a novel mechanism  
39 whereby mitochondrial retrograde signalling affects chloroplast functions.

## 40 Keywords

41 Arabidopsis thaliana, mitochondrial dysfunction stimulon, alternative oxidases, hypoxia, reactive  
42 oxygen species, photosynthetic electron transfer.

## 43 Background

44 Photosynthetic light reactions are subject to precise transcriptional and post-translational regulation.  
45 Transcriptional regulation is, at least in part, mediated by retrograde signals that are emitted by the  
46 organelles to trigger nuclear transcriptional reprogramming. Post-translational regulation allows  
47 rapid operational control of photosynthesis in a changing light environment. For example, light-  
48 dependent acidification of the thylakoid lumen activates protective adaptation in two photosynthetic  
49 complexes, Photosystem II (PSII) and  $b_6f$ . Protonation of the PSII subunit PsbS induces non-  
50 photochemical quenching (NPQ) [1]. NPQ allows PSII to convert light energy to heat rather than  
51 charge separation, thus protecting downstream components of photosynthetic electron transfer  
52 (PET) from excessive reducing power. In addition, acidification of the thylakoid lumen hinders  
53 electron transfer through the  $b_6f$  complex in a process referred to as “photosynthetic control” [2, 3].  
54 This also protects the downstream PET components, mainly Photosystem I (PSI), from excessive  
55 reducing power. When cellular energy demands increase, the activity of the thylakoid ATP synthase  
56 counterbalances acidification of the thylakoid lumen, thus lowering NPQ and easing the  $b_6f$  control  
57 [4, 5].

58 These and many other adaptations of photosynthesis partly depend on thiol redox regulation.  
59 Numerous chloroplastic thiol regulatory enzymes receive reducing power either from ferredoxin  
60 through ferredoxin:thioredoxin disulfide oxidoreductase (FTR) or from NADPH through NADPH-  
61 thioredoxin oxidoreductase of type C (NTRC) [6-8] and relay this reducing power to thiol redox  
62 enzymes. This allows adjustment of metabolic processes in chloroplasts in accordance with light  
63 conditions and the redox status of the PET chain. Recently, several studies have revealed a  
64 functional link between redox states of chloroplast thiol enzymes and reactive oxygen species  
65 (ROS) [9-12]. Chloroplastic ROS were suggested to oxidise the abundant thiol enzymes 2-Cys  
66 peroxiredoxins (2-CPs), thus draining reducing power away from the thiol redox system.

67 One of the main sources of chloroplastic ROS is the reduction of molecular oxygen by PSI, referred  
68 to as Mehler’s reaction [13, 14]. This electron transfer pathway can be artificially enhanced by  
69 treating plants with the herbicide methyl viologen (MV, also known as paraquat), a compound that  
70 shuttles electrons from PSI to  $O_2$ . The effect of MV on photosynthesis is observed at several levels.  
71 Firstly, MV contributes to oxidation of PSI, thus affecting PET [15, 16]. Secondly, the chemical  
72 allows Mehler’s reaction to out-compete other electron transfer pathways downstream from PSI,  
73 including cyclic electron flow [17], the pathways to FTR and NADPH, and further to thiol redox  
74 enzymes [18]. These two effects take place as soon as plants pre-treated with MV are exposed to

75 light. Finally, MV stimulates the formation of ROS. Gradual light-dependent increase in ROS  
76 production rate ultimately leads to destabilization of PSII and to cell death [9, 18, 19].

77 Chloroplast ROS production and processing are sensitive to the expression of proteins encoded by  
78 the nuclear mitochondrial dysfunction stimulon (MDS) genes [9, 20, 21]. Expression of these genes  
79 is controlled by the retrograde signal triggered by perturbations of mitochondrial electron transfer.  
80 In Arabidopsis, the MDS signalling pathway is mediated by at least two transcription factors,  
81 ANAC013 [20] and ANAC017 [22], and is inhibited by the nuclear co-regulator protein RCD1 [9].  
82 As expected, most proteins encoded by MDS genes are related to mitochondrial functions. In plants  
83 with enhanced MDS gene expression, including the *rcd1* mutant and *ANAC013* overexpressor,  
84 changes in mitochondria coincide with increased tolerance to MV activity in the chloroplasts [9, 20,  
85 21]. Furthermore, chloroplasts of the *rcd1* mutant have altered redox state when compared to the  
86 Col-0 wild type [23, 24]. However, the molecular nature of this inter-organellar interaction remains  
87 obscure. One prominent set of MDS gene products are alternative oxidases (AOXs), mitochondrial  
88 enzymes with ubiquinol: oxygen oxidoreductase activity. These enzymes are likely candidates for a  
89 role in modulating chloroplastic ROS processing. AOXs are known to provide an extra-  
90 chloroplastic electron sink for PET [25-28]. Pharmacological or genetic inhibition of AOX activity  
91 correlated with suppressed photosynthesis and decreased tolerance of plants to MV [9, 27, 29].  
92 Importantly, AOX activity has also been implicated in the maintenance of mitochondrial oxygen  
93 homeostasis [30, 31] and generation of hypoxia in developing plant tissues [32]. It has been  
94 suggested that AOXs have evolved as oxygen-scavenging enzymes that affect energy metabolism  
95 and mitochondrial ROS formation through decreasing intracellular concentrations of molecular  
96 oxygen [30, 33].

97 Studies using the Arabidopsis *rcd1* mutant suggested that AOX activity modulates PET [9],  
98 however the mechanistic details are yet unknown. Here we aimed to understand how enhancement  
99 of Mehler's reaction by MV affects PET, and by which mechanisms mitochondrial retrograde  
100 signals regulating AOXs could influence these chloroplastic processes. Our data suggest that  
101 activated MDS signalling may contribute to depletion of molecular oxygen, thereby possibly  
102 affecting Mehler's reaction. This putative pathway would represent a novel mode of interaction  
103 between mitochondria and chloroplasts.

104

## 105 Results and discussion

### 106 **Methyl viologen inhibits photosynthetic oxygen evolution through fast generation of NPQ**

107 Methyl viologen (MV) catalyses the transfer of electrons from Photosystem I (PSI) to molecular  
108 oxygen, resulting in oxidation of photosynthetic electron transfer (PET) chain and generation of  
109 reactive oxygen species (ROS). Increased ROS production gradually inhibits Photosystem II (PSII).  
110 The impact of catalytic concentrations of MV on PET is evident within the first seconds of  
111 illumination. To visualize this effect, we pre-treated wild-type (Col-0) Arabidopsis leaf discs with 1  
112  $\mu\text{M}$  MV overnight in darkness and imaged fast chlorophyll fluorescence rise induced by saturating  
113 light (OJIP, standing for  $F_0$ ,  $F_j$ ,  $F_i$ , and  $F_p = F_m$  phases of fluorescence induction kinetics [34,  
114 35]). We performed the measurement without prior light exposure to minimize ROS-induced  
115 damage of PSII. The effect of MV was visible already after 40 msec of illumination as lowered  $F_i$ -  
116  $F_m$  phase of the OJIP kinetics (Fig. 1A). This phenomenon has previously been ascribed to  
117 oxidative action of MV on the electron-acceptor side of PSI [15-17]. It has been proposed that MV  
118 releases “a traffic jam of electrons caused by a transient block at the acceptor side of PSI” [15].  
119 Accordingly, the quantum yield of the electron transport flux until the PSI electron acceptors,  
120 defined as  $\phi_{RE10} = 1 - F_i/F_m$  [35], was diminished by MV treatment in all the tested lines (Fig.  
121 1B).

122 We next followed the dynamics of chlorophyll fluorescence over the first minutes of illumination  
123 with non-saturating light of  $80 \mu\text{mol m}^{-2} \text{s}^{-1}$  (Fig. 1C). Wild-type leaf discs pre-treated with  $1 \mu\text{M}$   
124 MV and exposed to low light developed decreased steady-state fluorescence ( $F_s$ ) and decreased  
125 maximal fluorescence under light ( $F_m'$ ) as compared to the untreated control (Fig. 1C). The same  
126 was observed in the MV-tolerant mutant *rcd1*. In contrast, pre-treatment with MV did not change  
127  $F_m'$  in the *npq4* mutant and led to increase in  $F_s$  (Fig. 1C, D). The *npq4* mutant is deficient in the  
128 PSII subunit PsbS and is thus incapable of non-photochemical quenching (NPQ). Thus, the results  
129 indicated that in non-saturating light the quenching effect of MV on chlorophyll fluorescence in  
130 Col-0 and *rcd1* was related to NPQ. The increase of  $F_s$  in MV-treated *npq4* could possibly be due to  
131 the negative effect of thylakoid acidification on the electron transfer through the  $b_6f$  complex,  
132 known as “photosynthetic control”.

133 Rapid development of NPQ /  $b_6f$  complex control in MV-treated plants likely indicates enhanced  
134 acidification of thylakoid lumen under non-saturating light conditions. This acidification could be  
135 triggered by increased activity of the  $b_6f$  complex and/or by suppressed proton efflux through the  
136 thylakoid ATP synthase [5]. The elevated  $b_6f$  complex activity could result from increased electron

137 flux downstream from PSI, while the ATP synthase could be suppressed due to competition of the  
138 enhanced Mehler's reaction with thiol redox pathways that activate ATP synthase. However,  
139 validating these assumptions will be the subject of further research.

140 NPQ prevents charge separation in PSII. Therefore, it was reasonable to assume that MV would  
141 also inhibit O<sub>2</sub> production by the PSII water-splitting complex. To test if this was indeed the case,  
142 we measured O<sub>2</sub> evolution in MV-treated leaf discs using membrane inlet mass spectrometry  
143 (MIMS). This technique allows real-time monitoring of multiple compounds produced and  
144 absorbed through leaf gas exchange [36]. The use of isotope-labelled gases allowed us to  
145 distinguish production and absorption of gases (Suppl. Fig. 1). As expected, the measurements  
146 revealed markedly decreased O<sub>2</sub> evolution already during the first minutes of illumination in the  
147 Col-0 wild type (Fig. 2A). Of note is the fact that MV did not inhibit respiration, as inferred from  
148 the measurements of CO<sub>2</sub> evolution (Fig. 2A, Suppl. Fig. 1). The results suggest that upon exposure  
149 to light, MV-pre-treated wild type plants experienced fast activation of NPQ / b<sub>6</sub>f complex control,  
150 which led to suppression of PSII activity and decreased photosynthetic O<sub>2</sub> evolution. This  
151 suppression of PSII activity occurred before any visible ROS-related damage to PSII.

#### 152 **Exposure to light reversibly inactivates MV in the *rcd1* mutant**

153 We next analysed the effects of MV in the Arabidopsis mutant *rcd1*. In this mutant, constitutively  
154 activated mitochondrial retrograde signalling affects chloroplast ROS processing, resulting in  
155 tolerance to MV [9]. Similar to wild type, MV caused a pronounced decrease in O<sub>2</sub> evolution in  
156 *rcd1*, which could be due to suppression of PSII electron-transfer activity by NPQ (Fig. 2B).  
157 Moreover, again as in Col-0, MV did not affect CO<sub>2</sub> evolution in *rcd1*, suggesting uninhibited  
158 respiration. When plants are exposed to light, photosynthetic carbon fixation reabsorbs a fraction of  
159 CO<sub>2</sub> produced by respiration, thus lowering net CO<sub>2</sub> emission [37]. In control conditions, we  
160 observed this light-dependent change in both genotypes (Suppl. Fig. 1). Treatment with MV  
161 prevented light-dependent CO<sub>2</sub> reabsorption in Col-0, but not in *rcd1* (Fig. 2B, right panel; Suppl.  
162 Fig. 1). This suggested that, in spite of NPQ-suppressed PSII activity and oxygen evolution,  
163 photosynthetic carbon fixation was still active in MV-treated *rcd1*. This was possibly due to  
164 residual PSII activity and altered cyclic electron transfer pathways.

165 To address PET in *rcd1*, we measured the kinetics of chlorophyll fluorescence in low light. During  
166 the first minutes of low light exposure, *rcd1* performed like the wild type (Fig. 1C, D). However,  
167 longer light treatment led to gradual recovery of F<sub>m</sub>' in *rcd1*, but not in Col-0 (Fig. 3A). To test  
168 whether this effect was related to the release of NPQ, we next treated *rcd1* leaf discs with nigericin.

169 This chemical impedes NPQ by preventing build-up of thylakoid proton gradient. When applied  
170 together with MV, nigericin suppressed both the initial drop of Fm' and its concomitant recovery in  
171 *rcd1* (Suppl. Fig. 2A). We next generated an *rcd1 npq4* double mutant. When exposed to light, the  
172 MV pre-treated *rcd1 npq4* demonstrated neither the initial drop, nor the subsequent recovery of Fm'  
173 characteristic of *rcd1* (Suppl. Fig. 2B). Importantly, during prolonged light treatment the tolerance  
174 of *rcd1 npq4* to MV-dependent PSII inhibition was significantly suppressed as compared to *rcd1*  
175 (Fig. 3B). Taken together, these observations suggest that alterations in NPQ contribute to MV  
176 tolerance of *rcd1* and that exposure to light gradually modified MV-induced NPQ in *rcd1*.

177 The tolerance of *rcd1* to MV is not due to diminished access of the chemical to PSI [9]. Thus, the  
178 described dynamics of chlorophyll fluorescence imply that light treatment gradually suppressed  
179 electron transfer through MV in the chloroplasts of *rcd1*, but not of Col-0 (Fig. 3A). Interestingly,  
180 this inactivation was reversible. This was shown by interrupting light treatment with 20-min dark  
181 periods. After each dark treatment, *rcd1* demonstrated decrease in Fm' followed by recovery  
182 (Suppl. Fig. 2C), suggesting that the activity of chloroplastic MV was “reset” in darkness. This  
183 supports our assumption that in *rcd1* MV was not removed from its site of action, rather its function  
184 underwent reversible light-dependent quiescence.

### 185 **Physiological effect of MV in *rcd1* is abolished in hypoxic environment**

186 The above data suggested that in the *rcd1* mutant exposure to light lowered the physiological  
187 activity of MV. The activity of MV depends on the availability of molecular oxygen. Treatment of  
188 plants with MV suppressed endogenous photosynthetic O<sub>2</sub> evolution, but not respiration (Fig 2A,  
189 B). Moreover, formation of ROS, in particular H<sub>2</sub>O<sub>2</sub>, could form an oxygen sink further enhancing  
190 the oxygen deficit. This raises the question of whether these physiological circumstances would  
191 increase the demand for uptake of atmospheric oxygen. Thus, we exposed leaf discs to hypoxia by  
192 flushing nitrogen gas for 15 minutes in darkness, and measured chlorophyll fluorescence as in Fig.  
193 1C. In all the tested lines hypoxia led to increased Fs and Fm', as compared to the aerobic controls  
194 (Fig. 4A). This was anticipated, since molecular oxygen acts as an electron sink for a number of  
195 chloroplastic processes including the Mehler's reaction and activity of the chloroplast terminal  
196 oxidase PTOX. In the wild type, MV markedly diminished the hypoxia-related rise in chlorophyll  
197 fluorescence (Fig. 4B). This was likely due to catalysis of Mehler's reaction, which consequently  
198 compensated for oxygen deficiency. Importantly, the same effect of MV was observed in the *ptox*  
199 mutant, indicating that it was not associated with the PTOX activity (Suppl. Fig. 3). Similarly, MV  
200 lowered chlorophyll fluorescence in hypoxia-treated *npq4* and *stn7*, suggesting that the shift was not  
201 due to NPQ or chloroplast state transitions (Suppl. Fig. 3). In striking contrast to all of the above



202 plant lines, in *rcd1* MV did not lower chlorophyll fluorescence under hypoxic conditions (Fig. 4A,  
203 B). This implied that hypoxia compromised the electron flow through MV in *rcd1*.

204 It remained unclear whether the oxygen limitation affected MV activity directly at the electron-  
205 acceptor side of PSI, or indirectly, for example, through changes in mitochondrial respiration. To  
206 address this question, we performed OJIP imaging in leaf discs pre-treated overnight with 1  $\mu$ M  
207 MV (Fig. 4C). Under aerobic conditions, the fluorescence induction kinetics was similar in Col-0  
208 and *rcd1* (left panel). In both lines, MV lowered the Fi-Fm rise after 40 msec of illumination.  
209 Flushing nitrogen gas over leaf discs led to increased Fo-Fj phase in both lines. This effect has  
210 previously been attributed to induced fermentative metabolism and over-reduction of the  
211 chloroplast plastoquinone pool [38]. Most importantly, while suppression of the Fi-Fm rise by MV  
212 was still detected in the wild type, it was absent in *rcd1* (Fig 4C, right panel, Fig. 4D).

213 Fast change in OJIP kinetics induced by nitrogen gas flush made it difficult to observe the transition  
214 of PET from the aerobic to the hypoxic state. Thus, we generated hypoxia using an alternative  
215 approach, by placing MV-pre-treated leaf discs in the AnaeroGen anaerobic gas generator. This  
216 system decreases oxygen concentration below 0.5% while producing 9-13% of CO<sub>2</sub> [39]. To  
217 prevent CO<sub>2</sub> accumulation, we supplemented the anaerobic container with a CO<sub>2</sub> absorbent reagent.  
218 Over 12 hours of dark incubation, 1-sec saturating light pulses were triggered once in 30 min to  
219 image OJIP kinetics. The treatment resulted in similar changes of OJIP as those observed with  
220 nitrogen gas flush. The raw fluorescence curves are presented in Fig. 4E, and the calculated  $\phi$ RE1o  
221 parameter in Fig. 4F. In MV-pre-treated *rcd1*, hypoxic treatment restored the Fi-Fm rise to the  
222 levels observed in MV-untreated controls, while this did not happen in MV-pre-treated Col-0 (Fig.  
223 4E, F). Thus, physiological effect of MV on oxidation of the electron-acceptor side of PSI was  
224 prevented by hypoxia in the *rcd1* mutant.

225 These results raise the question why the *rcd1* mutant is more responsive to externally generated  
226 hypoxia than the wild type. At least two possibilities exist. One relates to altered stomatal functions  
227 of the mutant. Indeed, *rcd1* has been shown to have slightly higher stomatal conductance than the  
228 wild type in light [40]. However, this difference is unlikely to play a decisive role in darkness, when  
229 stomata should be largely closed, and in the presence of MV that has also been shown to promote  
230 stomatal closure [41]. The effect of hypoxia on the activity of MV was sustained in *rcd1* during  
231 several hours of dark hypoxic treatment, while it was completely absent from Col-0 (Fig. 4F),  
232 which is hard to explain by moderate difference in stomatal conductance. Another possible reason  
233 for the sensitivity of *rcd1* to hypoxia may be related to the altered mitochondrial functions of the  
234 mutant.



235 In a recent study, we demonstrated that expression of MDS genes activated by mitochondrial  
236 retrograde signalling, and subsequent accumulation of MDS gene products affected mitochondrial  
237 respiration in *rcd1* [9]. One group of the MDS gene products, AOXs, have been proposed to limit  
238 oxygen concentrations in plant mitochondria [30, 31] and tissues [32]. Taking this into account, it  
239 could be possible that the enhanced AOX activity may provide increased oxygen sink in the leaf  
240 tissues of *rcd1*. In standard growth conditions the effect is masked by gas exchange through stomata  
241 and photosynthetic oxygen evolution. Treatment with MV inhibits O<sub>2</sub> evolution (Fig. 2A, B) and  
242 stimulates stomatal closure [41]. It could thereby promote oxygen depletion in *rcd1* tissues, thus  
243 inhibiting Mehler's reaction. The relevance of this effect for MV tolerance of *rcd1* and, more  
244 generally, for the interaction between the energy organelles, is a subject of further research.

### 245 **Increased expression of MDS genes is linked to hypoxic response**

246 We aimed to find out whether the altered response to hypoxia observed in *rcd1* exists in other  
247 MDS-inducing lines or treatments. The mitochondrial respiration inhibitor antimycin A (AA)  
248 activates MDS retrograde signalling. Accordingly, in wild-type plants pre-treated with AA, hypoxia  
249 led to decreased MV activity (Suppl. Fig. 4A, B). Measurement of OJIP kinetics in plants  
250 overexpressing *ANAC013* [20, 21] revealed quiescence of MV by hypoxia similar to that in *rcd1*  
251 (Suppl. Fig. 4C). These observations demonstrated that oxygen availability affected the MV  
252 response not only in the *rcd1* mutant, but also under other perturbations activating MDS gene  
253 expression.

254 To explore possible similarities of MDS gene expression with hypoxic response, we performed  
255 meta-analysis of the corresponding publically available transcriptomic datasets, including the genes  
256 differentially expressed in the *rcd1* mutant in standard growth conditions, the genes affected by a 3-  
257 hour treatment with 50  $\mu$ M AA, or by a 2-hour treatment with hypoxia. A statistically significant  
258 overlap was found between the genes whose expression was activated in *rcd1*, under AA, and under  
259 hypoxic treatment (Fig. 5). The 19 genes that were activated in all the perturbations included the  
260 hypoxia-responsive universal stress protein 1 (*HRU1*), the stress-responsive transcription factor  
261 *ZAT10*, transcription factor *WRKY25*, as well as the MDS genes *AOXs* and *SOT12*. The *SOT12*  
262 sulfotransferase is a component of the 3'-phosphoadenosine 5'-phosphate (PAP) metabolic pathway.  
263 PAP mediates retrograde signalling by mitochondria and chloroplasts and is linked to the activity of  
264 *RCD1* [9, 42]. Noteworthy, *RCD1* protein itself was shown to interact with transcription factors  
265 implicated in mitochondrial (*ANAC013/ANAC017* [9]) and chloroplast (*Rap2.4a* [23]) retrograde  
266 signalling, along with dozens of other transcription factors [43]. This suggests that the role of *RCD1*  
267 as the hub merging retrograde and other signalling pathways in the nucleus could be indirectly

268 modulated by cellular oxygen availability. The full gene list is presented in Supplementary Table 2.  
269 These results suggested that transcriptional reprogramming induced by hypoxia bears similarity to  
270 the changes in gene expression observed in the *rcd1* mutant or after AA treatment (Fig. 5,  
271 Supplementary Table 2).

272 Taken together, our results suggest that the activity of one or more MDS gene products may affect  
273 oxygen availability at the electron-acceptor side of PSI. The effect may likely be related to  
274 alterations in mitochondrial respiration and AOX activity. This opens up new experimental  
275 possibilities to explore the mechanisms and significance of chloroplastic and mitochondrial  
276 retrograde signalling in natural physiological conditions.

### 277 **Chloroplast NTRC system is over-reduced in *rcd1***

278 The above-described and previously published results indicated decreased ROS production in the  
279 chloroplasts of *rcd1* and other MDS-inducing mutants or treatments [9, 20, 21]. Chloroplastic ROS  
280 act as an electron sink for thiol redox enzymes [10-12]. Thus, suppressed ROS production likely  
281 results in more reduced redox state of these enzymes. Accordingly, chloroplast 2-Cys peroxiredoxin  
282 (2-CP) pool was more reduced in the *rcd1* mutant than in wild type [9]. The main enzyme reducing  
283 2-CPs *in vivo* is NADPH-thioredoxin oxidoreductase of type C (NTRC) that is reduced by NADPH  
284 [6-8]. We assessed the *in vivo* redox state of NTRC in *rcd1* with thiol bond-specific labelling.  
285 Similarly to 2-CP, the NTRC pool was more reduced in *rcd1* than in wild type both in light and  
286 darkness (Fig 6A). This enzyme controls a number of chloroplastic processes including ROS  
287 processing [10, 11, 44], activities of thylakoid NADH dehydrogenase (NDH) complex mediating  
288 cyclic electron transfer [45], and of ATP synthase [46, 47].

289 To assess whether the phenotypes of *rcd1* depend on NTRC, we generated and characterized an  
290 *rcd1 ntrc* double mutant. To compare metabolic fluxes of *rcd1* and *rcd1 ntrc*, we fed leaf discs with  
291 uniformly <sup>14</sup>C-labelled glucose and analysed the distribution of radioactive label between  
292 fractionated plant extracts and evolved CO<sub>2</sub>, as described in [9] (Supplementary Table 3). Total  
293 uptake and metabolism of glucose, significantly elevated in *rcd1* in light, were suppressed to wild-  
294 type levels in *rcd1 ntrc* (Fig. 6B). These results suggest that alterations in the energy metabolism of  
295 *rcd1* were partially mediated by NTRC.

296 NTRC regulates activity of the thylakoid NDH complex, one of the major pathways mediating  
297 chloroplast cyclic electron flow and reduction of plastoquinone pool in light and darkness. Hence,  
298 we next evaluated NDH activity in *rcd1* by assessing the redox state of the plastoquinone pool.  
299 Reduced plastoquinone pool activates the chloroplast kinase STN7 that phosphorylates the light-

300 harvesting antenna complex II (LHCII). Thus, phosphorylation of LHCII can be used as an indirect  
301 measure of the plastoquinone redox state. Immunoblotting of total protein extracts from overnight  
302 dark-adapted seedlings with anti-phospho-threonine antibody revealed increased phosphorylation of  
303 LHCII in *rcd1* (Fig 6C). This indicated that similarly to *NTRC*-overexpressing plants [45], the  
304 plastoquinone pool was reduced in *rcd1* in darkness, which is suggestive of increased NDH activity.  
305 Dark LHCII phosphorylation in *rcd1 ntrc* was suppressed as compared to *rcd1* (Fig. 6C). Thus, the  
306 increased activity of the NDH complex in *rcd1* was likely mediated by NTRC. Gas exchange  
307 measurements indirectly suggested altered cyclic electron flow in MV-treated *rcd1* (Fig. 2B).  
308 Further research is needed to address the roles played by NTRC and NDH in this response.

### 309 **NTRC is linked to chloroplast ROS processing and regulation of PET**

310 Long illumination of MV-treated plants revealed that the *ntrc* mutant was more sensitive to MV  
311 than Col-0, and *rcd1 ntrc* was more sensitive to MV than *rcd1*. The *NTRC* overexpressor line [48]  
312 was more tolerant to MV than the wild type (Fig. 6D). We thus tested how NTRC was implicated in  
313 specific reactions of *rcd1* to MV described above. Leaf discs were pre-treated with MV in darkness  
314 and exposed to low light as in Fig. 3A (Fig. 7A). Treatment with MV resulted in NPQ-related  
315 decrease of Fm' in all the tested lines. However, no *rcd1*-specific Fm' recovery was observed in  
316 *rcd1 ntrc*. This indicates that the gradual release of NPQ in *rcd1* was dependent on NTRC.  
317 Acidification of the thylakoid lumen, and thus NPQ, is reversely correlated with the activity of  
318 thylakoid ATP synthase [5]. NTRC activates ATP synthase by thiol reduction [46]. Hence, it is  
319 likely that MV-induced thylakoid acidification was counteracted in *rcd1* through NTRC-dependent  
320 activation of ATP synthase. Of note, no changes in ATP synthase activity were detected in *rcd1*  
321 under standard light- or dark-adapted conditions (details in Suppl. Fig. 5). Further research is,  
322 however, needed to address the dynamics of ATP synthase activity in relation to the intensity of  
323 Mehler's reaction.

324 To test whether the activity of mitochondrial AOXs was implicated in this regulation, we pre-  
325 treated leaf discs with the AOX inhibitor salicylhydroxamic acid (SHAM). SHAM altered the  
326 response of *rcd1* to MV, resulting in increasing F<sub>s</sub> after about 20 min of illumination and  
327 decreasing Fm' after about 60 min (Fig. 7A). By contrast, no change in F<sub>s</sub> was observed in *rcd1*  
328 *ntrc*. Rising F<sub>s</sub> may indicate increased reduction of the plastoquinone pool [9]. This observation  
329 hinted that inhibition of AOX activity caused an NTRC-dependent flow of reducing power to the  
330 plastoquinone pool. As NTRC controls the activity of thylakoid NDH complex [45], it is reasonable  
331 to suggest that the reduction of the plastoquinone pool was mediated by NDH. Hence, the  
332 mitochondrial AOX activity was likely linked to regulation of chloroplast thiol redox enzymes and

333 thus PET. Overall, the above results indicated that activated expression of MDS genes coincided  
334 with a more reduced state of the chloroplast NTRC system and its targets, which affected the  
335 performance of PET at different levels.

336 The nuclear protein RCD1 likely plays multiple roles in the regulation of chloroplast thiol redox  
337 enzymes. Binding to ANAC013/ANAC017 transcription factors allows RCD1 to inhibit expression  
338 of MDS genes including *AOXs* [9]. Further control over organelles might be achieved through  
339 interaction of RCD1 with other transcription factors, such as Rap2.4a [23]. Finally, RCD1 protein is  
340 sensitive to ROS/redox-related retrograde signals emitted by the chloroplast [9]. Dissecting this  
341 trans-organelle regulatory loop is the subject of further research.

## 342 Conclusions

343 Mitochondrial retrograde signalling controls expression of the nuclear MDS genes in *Arabidopsis*  
344 through the activity of at least two transcription factors, ANAC013 and ANAC017. The nuclear  
345 regulatory protein RCD1 interacts with these transcription factors, suppressing transcription of  
346 MDS genes [9]. Thus, MDS gene expression is constitutively increased in the *rcd1* knockout  
347 mutant. Accumulation of MDS gene products such as AOXs alter mitochondrial respiration. They  
348 also affect ROS metabolism and redox states of enzymes in the chloroplast (Fig. 7A) [9]. Here we  
349 show that the activity of one or more MDS gene products likely lowers oxygen availability in the  
350 chloroplasts (Fig. 7B). In standard growth conditions the effect is masked by photosynthetic oxygen  
351 evolution and gas uptake from the atmosphere. However, it can be observed in a hypoxic  
352 environment and following treatment with MV. The decreased oxygen availability at the electron-  
353 acceptor side of PSI coincides with, and possibly determines, the more reduced state of the  
354 chloroplast thiol enzyme NTRC and its targets, including the thylakoid ATP synthase and the  
355 thylakoid NDH complex. Through these components, oxygen limitation potentially modulates  
356 performance of PET (Fig. 7B). The proposed regulation may represent a novel mechanism, by  
357 which mitochondrial retrograde signalling affects photosynthesis.

## 358 Materials and methods

### 359 Plant lines and growth conditions

360 *Arabidopsis thaliana* (Col-0) plants were cultivated on soil (1:1 mix of peat and vermiculite) at a  
361 12-hour photoperiod and light intensity of 220–250  $\mu\text{mol m}^{-2} \text{s}^{-1}$ . For the measurements of LHCII  
362 phosphorylation, seedlings were grown for 12 days on 1 x MS basal medium (Sigma-Aldrich) with  
363 0.5% Phytigel (Sigma-Aldrich) without added sucrose, at a 12-hour photoperiod and light intensity

364 of 150-180  $\mu\text{mol m}^{-2} \text{s}^{-1}$ . *Arabidopsis npq4-1* [49], *rcd1-4* (GK-229D11), *ptox* [50], *stn7*  
365 (SALK\_073254), and *ntrc* (SALK 096776) mutants, as well as the *ANAC013* overexpressor line  
366 [20], and the *NTRC* overexpressor line [48], are of Col-0 background.

### 367 **Chemical and hypoxic treatments**

368 For treatments with chemicals, cut leaf discs were placed on Milli-Q water with added 0.05%  
369 Tween 20 (Sigma-Aldrich), with or without MV. Unless specified otherwise, 1  $\mu\text{M}$  MV was used.  
370 Final concentration of SHAM was 2 mM. It was prepared from the 2 M SHAM stock in DMSO.  
371 Thus, 1/1000 volume of DMSO was added to SHAM-minus controls. AA was applied in the final  
372 concentration of 2.5  $\mu\text{M}$ , as discussed in [9]. Dark pre-treatment with MV lasted from 1 hour to  
373 overnight depending on the experiment. Pre-treatment with SHAM lasted for 1 hour. Pre-treatment  
374 with AA was overnight. To generate hypoxic environment, nitrogen gas was flushed inside a  
375 custom-built chamber that contained detached plant rosettes or a multi-well plate with floating leaf  
376 discs. Chlorophyll fluorescence imaging was performed through the top glass lid of the chamber.  
377 Alternatively, the multi-well plate with plant material was placed into the sealed plastic bag of the  
378 AnaeroGen Compact anaerobic gas generator system (Oxoid). In the same bag, resazurin Anaerobic  
379 Indicator (Oxoid) was placed to control for anaerobic conditions, and LoFloSorb non-caustic  
380 containing carbon dioxide absorbent (Intersurgical) to prevent accumulation of  $\text{CO}_2$ .

### 381 **Direct fast imaging of OJIP chlorophyll fluorescence kinetics**

382 The imaging of OJIP fluorescence kinetics was performed using FluorCam FC800F from Photon  
383 Systems Instruments, Czech Republic ([www.psi.cz](http://www.psi.cz)). The instrument is described in [51]. It contains  
384 the ultra-fast sensitive CMOS camera, TOMI 3, developed by Photon Systems Instruments, that  
385 performs image acquisition with maximum frame rate of 20  $\mu\text{sec}$ . All acquired data are stored in the  
386 internal memory (1 GB) and transferred to the computer *via* the 1 GB communication Ethernet  
387 protocol. The required time resolution and minimization of the storage demands was achieved by  
388 the ability of the camera to record images on logarithmic or semi logarithmic time scale. FluorCam  
389 software was used to control the instrument and to analyze the data. The OJIP imaging protocol was  
390 comprised of the triple measurement of the background signal followed by three 20- $\mu\text{sec}$  flashes of  
391 saturating light to measure  $F_0$  and then a 100-second (Fig. 1A) or a 1-second (all other figures)  
392 saturating light pulse (3 500  $\mu\text{mol m}^{-2} \text{s}^{-1}$ ) to follow OJIP kinetics. Both the background and the  $F_0$   
393 values were averaged for further calculations. The frame period was set at 300  $\mu\text{sec}$ , and the  
394 integration time was 35-50  $\mu\text{sec}$ . The excitation light was generated by a pair of blue LED panels  
395 (470 nm) and filtered by dichroic filters that block light at 490-800 nm to avoid crosstalk with the

396 detection. To record chlorophyll fluorescence signal, the camera was equipped with 700-750-nm  
397 band filters.

### 398 **PAM chlorophyll fluorescence imaging**

399 To measure kinetics of  $F_s$  and  $F_m'$  and to assay long-term PSII inhibition, chlorophyll fluorescence  
400 was measured using Walz Imaging PAM essentially as described in [9].

### 401 **Measurement of gas exchange by membrane inlet mass spectrometry**

402 For the gas exchange measurements, 14-mm leaf discs were floated overnight in Milli-Q  $H_2O$   
403 supplemented with Tween 20 with or without  $1 \mu M$  MV at  $20^\circ C$ . Following the overnight  
404 incubation, 12.5-mm discs were cut from the center of the pre-treated discs in very dim light, and  
405 loaded into a sealed MIMS cuvette calibrated to  $22^\circ C$ . The cuvette was purged using air scrubbed  
406 of  $^{12}CO_2$  with carbosorb before  $^{13}CO_2$  gas (99%  $^{13}CO_2$ , Sigma-Aldrich, USA) was injected to  
407 approximately 2% by volume, and  $^{18}O_2$  gas (98%  $^{18}O_2$ , Cambridge Isotope Laboratories, UK) was  
408 enriched to approximately 3%. Samples were kept in darkness until gasses equilibrated between all  
409 areas of the leaf (approximately five minutes). Then data acquisition was commenced, comprising  
410 three minutes of darkness, seven minutes of light at the growth irradiance ( $120 \mu mol m^{-2} s^{-1}$ ) and  
411 three minutes of darkness. Light was provided by a halogen bulb *via* a liquid light guide. Masses  
412 32, 36, 44 and 45 were monitored with a Sentinel Pro magnetic sector mass spectrometer (Thermo  
413 Fisher, USA) allowing the calculation of  $O_2$  evolution by PSII (mass 32),  $O_2$  consumption by  
414 terminal oxidases and Mehler-type pathways (mass 36),  $CO_2$  production by mitochondrial activity  
415 [minus internal  $CO_2$  recaptured (mass 44)] and  $CO_2$  fixation by Rubisco [minus internal  $CO_2$   
416 recaptured (mass 45)]. Data processing was based on concepts and methods described by [36].

### 417 **Transcriptomic meta-analyses**

418 Gene expression data was acquired from ArrayExpress E-MTAB-662 (*rcd1*) [52], E-GEOD36011  
419 (antimycin A) [53] and E-GEOD-9719 (2-hr hypoxia) [54, 55]. Genes that both showed at least a 2-  
420 fold change and had a statistical significance of  $p < 0.05$  were considered as differentially expressed  
421 and were categorised as up- or down-regulated based on the direction of the change. The overlap of  
422 multiple gene lists was analysed using Venn diagrams. Pairwise Fischer's exact test was performed  
423 on the gene lists.

### 424 **Feeding with $^{14}C$ glucose and analysis of metabolic fluxes**

425  $^{14}C$  glucose labelling, fractionation and analysis of metabolic fluxes were performed as described in  
426 [9]. Arabidopsis leaf discs were incubated for 150 min in light with 5 mL of 10 mM MES-KOH



427 (pH 6.5) containing 1.85 MBq/mmol [U-<sup>14</sup>C] glucose (Hartmann Analytic) in a final concentration  
428 of 2 mM. Leaf discs of the dark experiment were incubated similarly but under the green light.  
429 Samples were washed with distilled water, harvested and kept at -80 °C for further analysis. The  
430 evolved <sup>14</sup>CO<sub>2</sub> was collected in 0.5 mL of 10% (w/v) KOH. Samples were extracted, fractioned and  
431 metabolic fluxes were analysed according to [9]. Material from frozen leaf discs was extracted in a  
432 two-step ethanolic extraction of 80% (v/v) and 50% (v/v). Supernatants were combined, dried and  
433 resuspended in 1 mL of water [56, 57]. The soluble fractions were separated into neutral, anionic,  
434 and basic fractions by ion-exchange chromatography as described in [57]. 2.5 mL of the neutral  
435 fraction were freeze-dried and resuspended in 100 µL of water for further enzymatic digestions as  
436 described in [58]. Phosphate esters of the soluble fractions were measured as in [9] and starch of the  
437 insoluble fractions was measured as described in [56]. Calculation of the fluxes was performed  
438 according to the assumptions described by Geigenberger et al., [59] and [60].

#### 439 **Thiol-specific labelling of protein extracts**

440 Thiol-specific labelling of protein extracts was done and interpreted as described in [9].

#### 441 **Measurement of ATP synthase activity by electrochromic shift**

442 Measurement of ATP synthase activity was done as described in [46].

#### 443 **Acknowledgements**

444 We thank Dr. Nikolai Belevich for constructing the hypoxia chamber, and Prof. Frank Van  
445 Breusegem for providing the *ANAC013* overexpressor line. We are grateful to Dr. Michael  
446 Wrzaczek and Dr. Mikael Brosché for critical and helpful comments on the manuscript, to Dr. T.  
447 Matthew Robson for suggesting a few important synonyms, and to Dr. Pedro Aphalo for the help in  
448 optimizing the anaerobic treatment assay.

#### 449 **Funding**

450 This work was supported by the University of Helsinki (JK); the Academy of Finland Centre of  
451 Excellence programs (2006-11; JK and 2014-19; JK, EMA, ET) and Research Grant (Decision  
452 250336; JK); the Czech Science Foundation (GA15-22000S; KP, ZB, and MT); PlantaSYST  
453 project by the European Union's Horizon 2020 research and innovation programme (SGA-CSA No  
454 664621 and No 739582 under FPA No. 664620; SA and ARF); Deutsche Forschungsgemeinschaft  
455 (DFG TRR 175 The Green Hub – Central Coordinator of Acclimation in Plants; FA and ARF).



## 456 Figure legends

457 **Figure 1. MV stimulates NPQ in the first minutes of illumination.** (A) Kinetics of chlorophyll  
458 fluorescence excited by saturating light in leaf discs that were pre-treated with 1  $\mu$ M MV in  
459 darkness. When plotted against time in logarithmic scale, the kinetics reveals several inflections  
460 defined as Fo-Fj, Fj-Fi, and Fi-Fm phases [34, 35]. Each phase is affected by different stages of  
461 PET. Fo-Fj relates to electron transfer within PSII up to  $Q_A$ , Fj-Fi to intersystem redox states of  
462 PET, and Fi-Fm to electron transfer downstream from PSI [15, 16]. MV treatment lowered the Fi-  
463 Fm rise, indicating enhanced oxidation of PSI. Kinetics are double normalized to fluorescence at Fo  
464 and Fi (20  $\mu$ sec and 40 msec, accordingly). The experiment was repeated three times with similar  
465 results. (B) False-colour image of the quantum yield of the electron transport flux until the PSI  
466 electron acceptors ( $\phi_{RE10} = 1 - Fi/Fm$ ) in absence or presence of MV. (C) Kinetics of chlorophyll  
467 fluorescence during exposure to low light. Pre-treatment with MV decreased  $F_s$  and  $F_m'$  in the wild  
468 type and in the MV-tolerant *rcd1*, but not in *npq4*. This suggests that fast effect of MV on PET is  
469 related to NPQ. All reads are normalized to Fo. (D) Quantification of chlorophyll fluorescence  
470 parameters described in (C). Untreated controls are labelled with “c”. Source data and statistical  
471 analyses are presented in Supplementary Table 1.

472 **Figure 2. MV inhibits oxygen evolution in wild type and in *rcd1* in the first minutes of**  
473 **illumination.** (A) MIMS measurements of O<sub>2</sub> and CO<sub>2</sub> gas exchange in the untreated (left) and MV  
474 pre-treated (right) Col-0 leaf discs. (B) O<sub>2</sub> and CO<sub>2</sub> gas exchange in the untreated (left) and MV  
475 pre-treated (right) leaf discs of *rcd1*. MV inhibited oxygen evolution both in Col-0 and *rcd1*, and  
476 CO<sub>2</sub> reabsorption in Col-0, while respiration was unaffected in both lines. The full data set is  
477 presented in the Suppl. Fig. 1.

478 **Figure 3. Exposure to light inhibits physiological activity of MV in the *rcd1* mutant.** (A)  
479 Kinetics of chlorophyll fluorescence during 2 hours of exposure to low light. Saturating light pulses  
480 were triggered once in 10 minutes to measure  $F_m'$ . In *rcd1* pre-treated with MV (right panel),  
481 exposure to light resulted in gradual recovery of  $F_m'$  to the control values (left panel), which was  
482 not observed in Col-0. The kinetics are normalized to Fo. The experiment was performed four times  
483 with similar results. The full experimental data set is presented in Fig. 7A. (B) The tolerance to  
484 MV-induced PSII inhibition was partially suppressed in the *rcd1 npq4* mutant as compared to *rcd1*,  
485 suggesting the importance of NPQ for MV tolerance of *rcd1*. Source data and statistical analyses  
486 are presented in Supplementary Table 1. The experiment was performed three times with similar  
487 results.

488 **Figure 4. Hypoxic environment counteracts physiological effect of MV in the *rcd1* mutant.** (A)  
489 Alterations in chlorophyll fluorescence induced by a 15-min pre-treatment with nitrogen gas in  
490 darkness. Source data and statistical analyses are presented in Supplementary Table 1. (B) Kinetics  
491 of chlorophyll fluorescence upon exposure to low light of leaf discs pre-treated with nitrogen as in  
492 (A). Under aerobic conditions, MV quenched fluorescence both in Col-0 and *rcd1*, while under  
493 hypoxia the effect of MV was not detectable in *rcd1*. The reads are normalized to  $F_0$  obtained in  
494 dark-adapted hypoxic conditions. Untreated controls are labelled with “c”. (C) Kinetics of  
495 chlorophyll fluorescence excited by saturating light. Leaf discs were pre-treated with 1  $\mu\text{M}$  MV in  
496 darkness and imaged under aerobic (left panel) or hypoxic (right panel) conditions. The inhibitory  
497 effect of MV on the  $F_i$ - $F_m$  phase was observed in both lines under aerobic conditions, but was  
498 absent from *rcd1* under hypoxia. Kinetics are double normalized to fluorescence at  $F_0$  and  $F_i$  (20  
499  $\mu\text{sec}$  and 40 msec, accordingly). (D) The same effect as in (C) shown with the false colour image of  
500  $\phi\text{REI}_0 = 1 - F_i/F_m$ . The experiment was performed four times with similar results. (E) Dynamic  
501 response of OJIP transients in MV-treated Col-0 and *rcd1* leaf discs subjected to hypoxia in  
502 AnaeroGen anaerobic gas generator. The experiment was performed twice with similar results. (F)  
503 The dynamics of  $\phi\text{REI}_0$  during transition to hypoxia described in panel (E). Source data and  
504 statistical analyses are presented in Supplementary Table 1.

505 **Figure 5. Similarities in transcriptional response of MDS-inducing perturbations and**  
506 **hypoxia.** Analysis of publically available transcriptomic datasets obtained in the *rcd1* mutant, in  
507 wild-type plants treated with antimycin A (AA) or in wild types treated with hypoxia. Venn  
508 diagrams show the overlap of up- (A) and down-regulated (B) genes. Genes with at least 2-fold  
509 change in expression and a significance of  $p < 0.05$  were considered as up- or down-regulated.  
510 Statistical analysis was performed by a pairwise Fisher’s exact test.

511 **Figure 6. Chloroplast NTRC mediates MV response and other phenotypes of *rcd1*.** (A)  
512 Chloroplast NTRC pool is more reduced in *rcd1* both in darkness (D) and light (L). Leaf protein  
513 extracts were subjected to thiol bond-specific labelling as described in [9]. Extracts were first  
514 treated with N-ethylmaleimide that blocked all the free thiol groups. Next, the *in vivo* thiol bridges  
515 were reduced with DTT. Finally, the extracts were treated with 5-kDa methoxypolyethylene glycol  
516 maleimide to label all the newly opened thiol groups. After separation in SDS-PAGE, the extracts  
517 were immunoblotted with the  $\alpha\text{NTRC}$  antibody. The unlabelled form (0) corresponds to *in vivo*  
518 reduced, while the labelled forms (1, 2, 3) to *in vivo* oxidized fractions of NTRC. The experiment  
519 was performed twice with similar results. (B) Total metabolized and total consumed radiolabelled  
520  $^{14}\text{C}$  glucose treated to light or dark-adapted rosettes. Mean values  $\pm$  standard errors are presented.

521 The full dataset is presented in the Supplementary Table 3. (C) Phosphorylation of LHCII in  
522 overnight dark-adapted seedlings as determined by immunoblotting with anti-phospho-threonine  
523 antibody. Amido black staining of total LHCII is shown in the lower panel as the loading control.  
524 (D) The tolerance to MV-induced PSII inhibition depends on NTRC. Two concentrations of MV  
525 were used, 0.1  $\mu$ M MV (top panel), or 1  $\mu$ M MV (bottom panel). The *ntrc* mutant was more  
526 sensitive and the *NTRC* overexpressor line more tolerant to MV as compared to Col-0. Tolerance to  
527 MV was partially suppressed in the *rcd1 ntrc* mutant as compared to *rcd1*. Source data and  
528 statistical analyses are presented in Supplementary Table 1. The experiment was performed three  
529 times with similar results.

530 **Figure 7. Interaction between mitochondria and chloroplasts in the MDS-inducing conditions.**

531 (A) Kinetics of chlorophyll fluorescence during 2 hours of exposure to low light. Saturating light  
532 pulses were triggered once in 10 minutes to measure  $F_m'$ . The *rcd1*-specific kinetics of  $F_m'$   
533 observed in MV-treated leaf discs was suppressed in *rcd1 ntrc*. The AOX inhibitor SHAM modified  
534 the response of PET to MV in *rcd1*, but not in *rcd1 ntrc*. The kinetics are normalized to  $F_o$ . The  
535 experiment was performed four times with similar results. (B) Altered mitochondrial respiration  
536 depends on the mitochondrial retrograde signal that activates expression of the nuclear MDS genes.  
537 The nuclear RCD1 protein suppresses expression of MDS genes. Thus, in the *rcd1* mutant MDS  
538 genes are constitutively induced. The activity of MDS gene products, including AOXs, may act as  
539 the sink for molecular oxygen. This can affect availability of  $O_2$  at the electron acceptor side of PSI,  
540 suppressing chloroplastic ROS production *via* Mehler's reaction. Chloroplastic ROS act as the  
541 electron sink for the NTRC system. Through NTRC, altered chloroplastic ROS processing may  
542 affect PET. Relevant pathways of chloroplast electron transfer are shown with red arrows, NTRC-  
543 dependent redox control with blue arrows. By catalysing Mehler's reaction, MV may drain reducing  
544 power away from ATP synthase. This promotes formation of proton gradient and onset of NPQ /  $b_6f$   
545 complex control inhibiting PSII electron transfer and  $O_2$  evolution activity. The resulting oxygen  
546 depletion reveals the putative effect of the MDS gene products on the chloroplastic Mehler's  
547 reaction, contributing to MV tolerance of the *rcd1* mutant.

548 **Supplementary figure legends**

549 **Supplementary Figure 1. Gas exchange in wild type and *rcd1* leaf discs as monitored by**  
550 **MIMS.** Wild type is in the left column, *rcd1* is in the right column.

551 **Supplementary Figure 2. The response of *rcd1* to MV is related to NPQ and is “reset” in**  
552 **darkness.** Chlorophyll fluorescence kinetics observed in *rcd1* in response to MV was suppressed  
553 by the proton gradient inhibitor nigericin (A) and in the *rcd1 npq4* double mutant (B), suggesting  
554 that the dynamics of  $F_m'$  was related to NPQ. The reads are normalized to  $F_o$ . (C) Introducing dark  
555 periods (“d”) in the course of light exposure temporarily restored NPQ in MV-treated *rcd1*,  
556 indicating that physiological activity of MV in this mutant was reversibly inhibited by light.

557 **Supplementary Figure 3. The combined effects of MV and hypoxia on PET.** Kinetics of  
558 chlorophyll fluorescence during exposure of leaf discs to low light after 15-min flushing of nitrogen  
559 gas in darkness. Pre-treatment with MV led to quenched chlorophyll fluorescence in all the tested  
560 lines. The presence of this effect in the *npq4*, the *ptox* and the *stn7* mutants suggested that it was not  
561 mediated by NPQ, PTOX chloroplast terminal oxidase, and chloroplast state transitions,  
562 accordingly. All reads are normalized to  $F_o$  obtained under dark-adapted hypoxic conditions.

563 **Supplementary Figure 4. Response to MV is sensitive to hypoxia in MDS-inducing**  
564 **perturbations other than the *rcd1* mutant.** (A) Pre-treatment of wild-type plants with 2.5  $\mu$ M  
565 antimycin A (AA) makes chlorophyll fluorescence under hypoxia insensitive to MV. This makes  
566 AA-treated Col-0 similar to *rcd1*. The reads are normalized to  $F_o$  obtained under dark-adapted  
567 hypoxic conditions. (B) Quantification of  $F_s$  obtained in the experiment shown in (A). The  
568 experiment was performed three times with similar results. (C) Similarly to *rcd1*, in *ANAC013*  
569 overexpressor line chlorophyll fluorescence under hypoxia was insensitive to MV. The curves are  
570 double normalized to fluorescence at  $F_o$  and  $F_i$  (20  $\mu$ sec and 40 msec, accordingly). The experiment  
571 was performed three times with similar results.

572 **Supplementary Figure 5. Activity of ATP synthase is unaltered in *rcd1* under standard**  
573 **growth conditions.** To find out whether the activity of the chloroplast ATP synthase was altered in  
574 *rcd1* under light-or dark-adapted growth conditions, we performed spectroscopic measurements of  
575 thylakoid proton motive force essentially as described in [46]. The decay rate of this parameter after  
576 the light flash is proportional to proton conductivity of the ATP synthase. The decay was rapid in  
577 light-adapted leaves where ATP synthase was fully activated, whereas dark incubation lead to  
578 inactivation of ATP synthase (red and black curves, accordingly). As expected, dark inactivation

579 was less pronounced in the *NTRC* overexpressor line characterized by increased activity of the ATP  
580 synthase. In these conditions, the *rcd1* mutant was indistinguishable from the wild type.

## 581 References

- 582 1. Ruban, A.V., *Light harvesting control in plants*. FEBS Lett, 2018. **592**(18): p. 3030-3039.
- 583 2. Tikhonov, A.N., *The cytochrome b6f complex at the crossroad of photosynthetic electron transport*
- 584 *pathways*. Plant Physiol Biochem, 2014. **81**: p. 163-83.
- 585 3. Colombo, M., et al., *Photosynthesis Control: An underrated short-term regulatory mechanism*
- 586 *essential for plant viability*. Plant Signal Behav, 2016. **11**(4): p. e1165382.
- 587 4. Kramer, D.M., J.A. Cruz, and A. Kanazawa, *Balancing the central roles of the thylakoid proton*
- 588 *gradient*. Trends in Plant Science, 2003. **8**(1): p. 27-32.
- 589 5. Strand, D.D. and D.M. Kramer, *Control of Non-Photochemical Exciton Quenching by the Proton*
- 590 *Circuit of Photosynthesis*. Non-Photochemical Quenching and Energy Dissipation in Plants, Algae
- 591 and Cyanobacteria, 2014. **40**: p. 387-408.
- 592 6. Nikkanen, L. and E. Rintamaki, *Chloroplast thioredoxin systems dynamically regulate photosynthesis*
- 593 *in plants*. Biochem J, 2019. **476**(7): p. 1159-1172.
- 594 7. Nikkanen, L. and E. Rintamaki, *Thioredoxin-dependent regulatory networks in chloroplasts under*
- 595 *fluctuating light conditions*. Philos Trans R Soc Lond B Biol Sci, 2014. **369**(1640): p. 20130224.
- 596 8. Naranjo, B., et al., *The chloroplast NADPH thioredoxin reductase C, NTRC, controls non-*
- 597 *photochemical quenching of light energy and photosynthetic electron transport in Arabidopsis*.
- 598 Plant Cell Environ, 2016. **39**(4): p. 804-22.
- 599 9. Shapiguzov, A., et al., *Arabidopsis RCD1 coordinates chloroplast and mitochondrial functions*
- 600 *through interaction with ANAC transcription factors*. Elife, 2019. **8**.
- 601 10. Ojeda, V., J.M. Perez-Ruiz, and F.J. Cejudo, *2-Cys Peroxiredoxins Participate in the Oxidation of*
- 602 *Chloroplast Enzymes in the Dark*. Mol Plant, 2018.
- 603 11. Vaseghi, M.J., et al., *The chloroplast 2-cysteine peroxiredoxin functions as thioredoxin oxidase in*
- 604 *redox regulation of chloroplast metabolism*. Elife, 2018. **7**.
- 605 12. Yoshida, K., et al., *Thioredoxin-like2/2-Cys peroxiredoxin redox cascade supports oxidative thiol*
- 606 *modulation in chloroplasts*. Proc Natl Acad Sci U S A, 2018. **115**(35): p. E8296-E8304.
- 607 13. Mehler, A.H., *Studies on reactions of illuminated chloroplasts. I. Mechanism of the reduction of*
- 608 *oxygen and other Hill reagents*. Arch Biochem Biophys, 1951. **33**(1): p. 65-77.
- 609 14. Asada, K., *The water-water cycle as alternative photon and electron sinks*. Philos Trans R Soc Lond B
- 610 Biol Sci, 2000. **355**(1402): p. 1419-31.
- 611 15. Schansker, G., S.Z. Toth, and R.J. Strasser, *Methylviologen and dibromothymoquinone treatments of*
- 612 *pea leaves reveal the role of photosystem I in the Chl a fluorescence rise OJIP*. Biochim Biophys Acta,
- 613 2005. **1706**(3): p. 250-61.
- 614 16. Schansker, G., S.Z. Toth, and R.J. Strasser, *Dark recovery of the Chl a fluorescence transient (OJIP)*
- 615 *after light adaptation: the qT-component of non-photochemical quenching is related to an activated*
- 616 *photosystem I acceptor side*. Biochim Biophys Acta, 2006. **1757**(7): p. 787-97.
- 617 17. Jia, H., et al., *Differential effects of severe water stress on linear and cyclic electron fluxes through*
- 618 *Photosystem I in spinach leaf discs in CO(2)-enriched air*. Planta, 2008. **228**(5): p. 803-12.
- 619 18. Hawkes, T.R., *Mechanisms of resistance to paraquat in plants*. Pest Manag Sci, 2014. **70**(9): p. 1316-
- 620 23.
- 621 19. Xiong, Y., et al., *Degradation of oxidized proteins by autophagy during oxidative stress in*
- 622 *Arabidopsis*. Plant Physiol, 2007. **143**(1): p. 291-9.
- 623 20. De Clercq, I., et al., *The membrane-bound NAC transcription factor ANACO13 functions in*
- 624 *mitochondrial retrograde regulation of the oxidative stress response in Arabidopsis*. Plant Cell, 2013.
- 625 **25**(9): p. 3472-90.
- 626 21. Van Aken, O., et al., *Mitochondrial and Chloroplast Stress Responses Are Modulated in Distinct*
- 627 *Touch and Chemical Inhibition Phases*. Plant Physiol, 2016. **171**(3): p. 2150-65.
- 628 22. Ng, S., et al., *A membrane-bound NAC transcription factor, ANACO17, mediates mitochondrial*
- 629 *retrograde signaling in Arabidopsis*. Plant Cell, 2013. **25**(9): p. 3450-71.

- 630 23. Hiltcher, H., et al., *The radical induced cell death protein 1 (RCD1) supports transcriptional*  
631 *activation of genes for chloroplast antioxidant enzymes*. Front Plant Sci, 2014. **5**: p. 475.
- 632 24. Heiber, I., et al., *The redox imbalanced mutants of Arabidopsis differentiate signaling pathways for*  
633 *redox regulation of chloroplast antioxidant enzymes*. Plant Physiol, 2007. **143**(4): p. 1774-88.
- 634 25. Vanlerberghe, G.C., *Alternative oxidase: a mitochondrial respiratory pathway to maintain metabolic*  
635 *and signaling homeostasis during abiotic and biotic stress in plants*. Int J Mol Sci, 2013. **14**(4): p.  
636 6805-47.
- 637 26. Dinakar, C., et al., *Alternative Oxidase Pathway Optimizes Photosynthesis During Osmotic and*  
638 *Temperature Stress by Regulating Cellular ROS, Malate Valve and Antioxidative Systems*. Front  
639 Plant Sci, 2016. **7**: p. 68.
- 640 27. Vishwakarma, A., et al., *Importance of the alternative oxidase (AOX) pathway in regulating cellular*  
641 *redox and ROS homeostasis to optimize photosynthesis during restriction of the cytochrome oxidase*  
642 *pathway in Arabidopsis thaliana*. Ann Bot, 2015. **116**(4): p. 555-69.
- 643 28. Selinski, J., et al., *Alternative Oxidase Is Positive for Plant Performance*. Trends Plant Sci, 2018.  
644 **23**(7): p. 588-597.
- 645 29. Watanabe, C.K., et al., *Mitochondrial Alternative Pathway-Associated Photoprotection of*  
646 *Photosystem II is Related to the Photorespiratory Pathway*. Plant Cell Physiol, 2016. **57**(7): p. 1426-  
647 1431.
- 648 30. Gupta, K.J., A. Zabalza, and J.T. van Dongen, *Regulation of respiration when the oxygen availability*  
649 *changes*. Physiol Plant, 2009. **137**(4): p. 383-91.
- 650 31. Rasmusson, A.G., A.R. Fernie, and J.T. van Dongen, *Alternative oxidase: a defence against metabolic*  
651 *fluctuations?* Physiol Plant, 2009. **137**(4): p. 371-82.
- 652 32. van Dongen, J.T. and F. Licausi, *Oxygen sensing and signaling*. Annu Rev Plant Biol, 2015. **66**: p. 345-  
653 67.
- 654 33. McDonald, A.E. and G.C. Vanlerberghe, *Origins, evolutionary history, and taxonomic distribution of*  
655 *alternative oxidase and plastoquinol terminal oxidase*. Comp Biochem Physiol Part D Genomics  
656 Proteomics, 2006. **1**(3): p. 357-64.
- 657 34. Stirbet, A. and Govindjee, *Chlorophyll a fluorescence induction: a personal perspective of the*  
658 *thermal phase, the J-I-P rise*. Photosynth Res, 2012. **113**(1-3): p. 15-61.
- 659 35. Stirbet, A. and Govindjee, *On the relation between the Kautsky effect (chlorophyll a fluorescence*  
660 *induction) and Photosystem II: basics and applications of the OJIP fluorescence transient*. J  
661 Photochem Photobiol B, 2011. **104**(1-2): p. 236-57.
- 662 36. Beckmann, K., et al., *On-line mass spectrometry: membrane inlet sampling*. Photosynth Res, 2009.  
663 **102**(2-3): p. 511-22.
- 664 37. Busch, F.A., et al., *C3 plants enhance rates of photosynthesis by reassimilating photorespired and*  
665 *respired CO2*. Plant Cell Environ, 2013. **36**(1): p. 200-12.
- 666 38. Nellaepalli, S., et al., *Anaerobiosis induced state transition: a non photochemical reduction of PQ*  
667 *pool mediated by NDH in Arabidopsis thaliana*. PLoS One, 2012. **7**(11): p. e49839.
- 668 39. Imhof, A. and I. Heinzer, *Continuous monitoring of oxygen concentrations in several systems for*  
669 *cultivation of anaerobic bacteria*. J Clin Microbiol, 1996. **34**(7): p. 1646-8.
- 670 40. Ahlfors, R., et al., *Arabidopsis RADICAL-INDUCED CELL DEATH1 belongs to the WWE protein-protein*  
671 *interaction domain protein family and modulates abscisic acid, ethylene, and methyl jasmonate*  
672 *responses*. Plant Cell, 2004. **16**(7): p. 1925-37.
- 673 41. McAinsh, M.R., et al., *Changes in Stomatal Behavior and Guard Cell Cytosolic Free Calcium in*  
674 *Response to Oxidative Stress*. Plant Physiol, 1996. **111**(4): p. 1031-1042.
- 675 42. Van Aken, O. and B.J. Pogson, *Convergence of mitochondrial and chloroplastic ANACO17/PAP-*  
676 *dependent retrograde signalling pathways and suppression of programmed cell death*. Cell Death  
677 Differ, 2017. **24**(6): p. 955-960.
- 678 43. Jaspers, P., et al., *Unequally redundant RCD1 and SRO1 mediate stress and developmental*  
679 *responses and interact with transcription factors*. Plant J, 2009. **60**(2): p. 268-79.
- 680 44. Perez-Ruiz, J.M., et al., *Rice NTRC is a high-efficiency redox system for chloroplast protection against*  
681 *oxidative damage*. Plant Cell, 2006. **18**(9): p. 2356-68.



- 682 45. Nikkanen, L., et al., *Regulation of cyclic electron flow by chloroplast NADPH-dependent thioredoxin*  
683 *system*. Plant Direct, 2018. **2**(11).
- 684 46. Nikkanen, L., J. Toivola, and E. Rintamaki, *Crosstalk between chloroplast thioredoxin systems in*  
685 *regulation of photosynthesis*. Plant Cell Environ, 2016. **39**(8): p. 1691-705.
- 686 47. Carrillo, L.R., et al., *Multi-level regulation of the chloroplast ATP synthase: the chloroplast NADPH*  
687 *thioredoxin reductase C (NTRC) is required for redox modulation specifically under low irradiance*.  
688 Plant J, 2016. **87**(6): p. 654-63.
- 689 48. Toivola, J., et al., *Overexpression of chloroplast NADPH-dependent thioredoxin reductase in*  
690 *Arabidopsis enhances leaf growth and elucidates in vivo function of reductase and thioredoxin*  
691 *domains*. Front Plant Sci, 2013. **4**: p. 389.
- 692 49. Li, X.P., et al., *A pigment-binding protein essential for regulation of photosynthetic light harvesting*.  
693 Nature, 2000. **403**(6768): p. 391-5.
- 694 50. Wetzal, C.M., et al., *Nuclear-organelle interactions: the immutans variegation mutant of*  
695 *Arabidopsis is plastid autonomous and impaired in carotenoid biosynthesis*. Plant J, 1994. **6**(2): p.  
696 161-75.
- 697 51. Kupper, H., et al., *Analysis of OJIP Chlorophyll Fluorescence Kinetics and QA Reoxidation Kinetics by*  
698 *Direct Fast Imaging*. Plant Physiol, 2019. **179**(2): p. 369-381.
- 699 52. Brosche, M., et al., *Transcriptomics and functional genomics of ROS-induced cell death regulation*  
700 *by RADICAL-INDUCED CELL DEATH1*. PLoS Genet, 2014. **10**(2): p. e1004112.
- 701 53. Ng, S., et al., *Cyclin-dependent kinase E1 (CDKE1) provides a cellular switch in plants between*  
702 *growth and stress responses*. J Biol Chem, 2013. **288**(5): p. 3449-59.
- 703 54. Branco-Price, C., et al., *Selective mRNA translation coordinates energetic and metabolic*  
704 *adjustments to cellular oxygen deprivation and reoxygenation in Arabidopsis thaliana*. Plant J, 2008.  
705 **56**(5): p. 743-55.
- 706 55. Sorenson, R. and J. Bailey-Serres, *Selective mRNA sequestration by OLIGOURIDYLATE-BINDING*  
707 *PROTEIN 1 contributes to translational control during hypoxia in Arabidopsis*. Proc Natl Acad Sci U S  
708 A, 2014. **111**(6): p. 2373-8.
- 709 56. Fernie, A.R., et al., *Fructose 2,6-bisphosphate activates pyrophosphate: fructose-6-phosphate 1-*  
710 *phosphotransferase and increases triose phosphate to hexose phosphate cycling in heterotrophic*  
711 *cells*. Planta, 2001. **212**(2): p. 250-63.
- 712 57. Obata, T., L. Rosado-Souza, and A.R. Fernie, *Coupling Radiotracer Experiments with Chemical*  
713 *Fractionation for the Estimation of Respiratory Fluxes*. Methods Mol Biol, 2017. **1670**: p. 17-30.
- 714 58. Carrari, F., et al., *Integrated analysis of metabolite and transcript levels reveals the metabolic shifts*  
715 *that underlie tomato fruit development and highlight regulatory aspects of metabolic network*  
716 *behavior*. Plant Physiol, 2006. **142**(4): p. 1380-96.
- 717 59. Geigenberger, P., et al., *Regulation of sucrose and starch metabolism in potato tubers in response*  
718 *to short-term water deficit*. Planta, 1997. **201**(4): p. 502-518.
- 719 60. Geigenberger, P., et al., *Metabolic activity decreases as an adaptive response to low internal oxygen*  
720 *in growing potato tubers*. Biological Chemistry, 2000. **381**(8): p. 723-740.

721

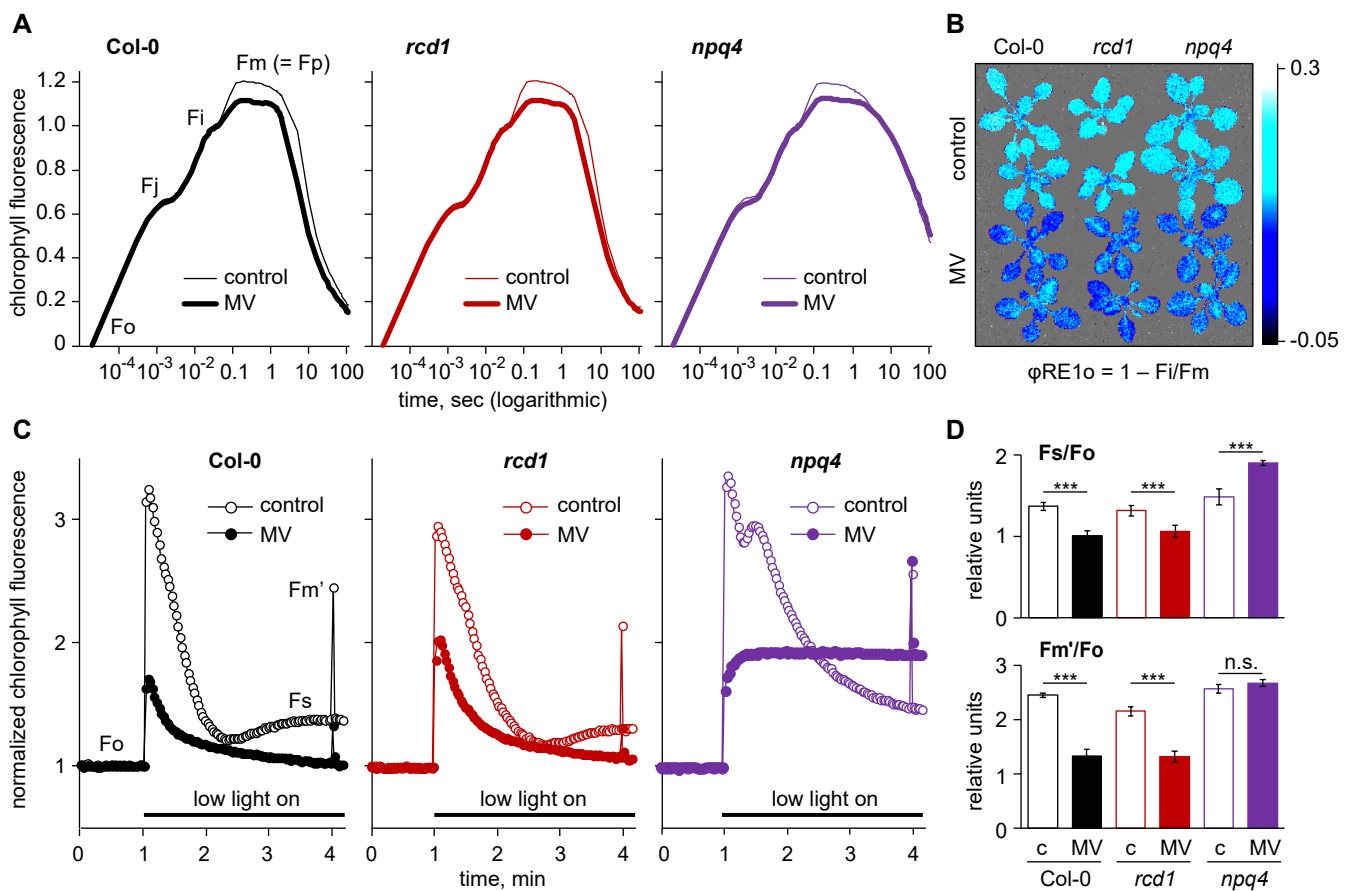

Figure 1

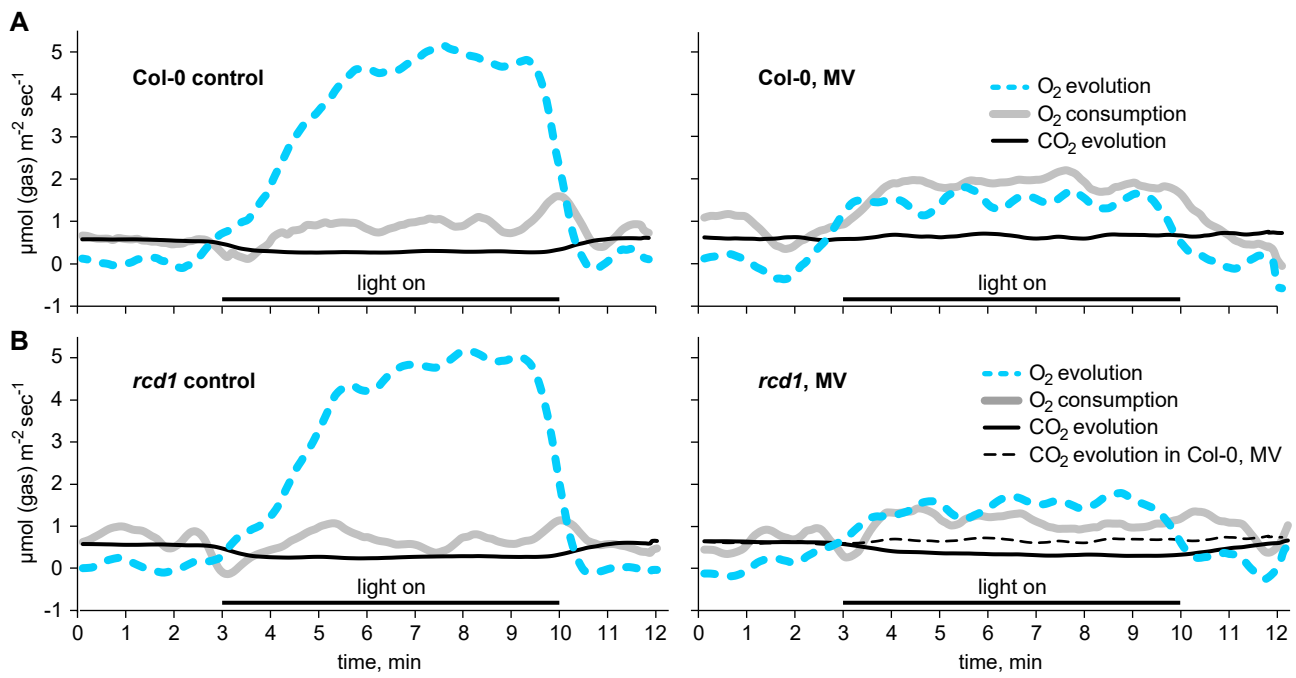

Figure 2

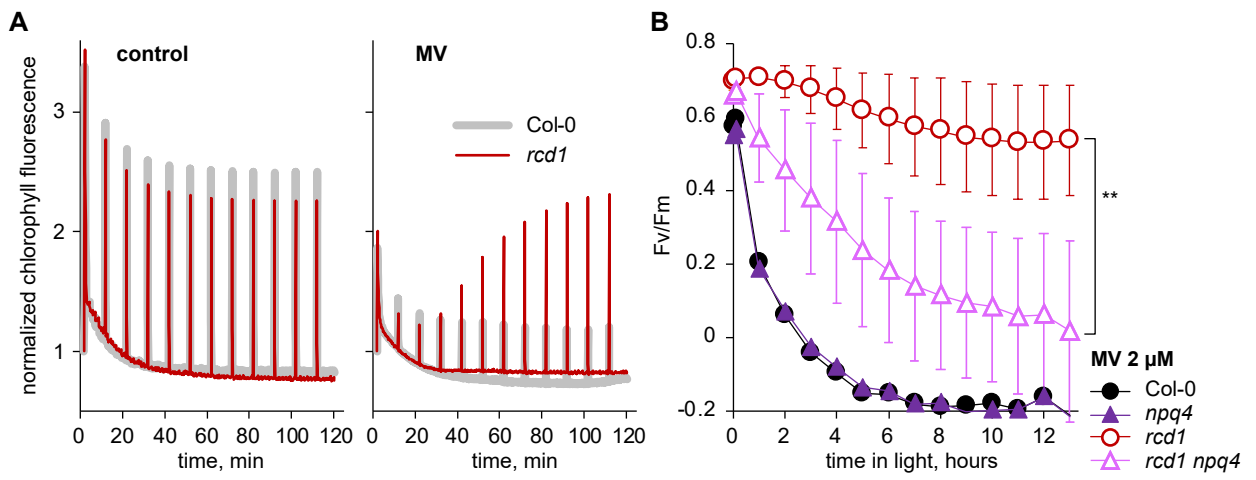

Figure 3

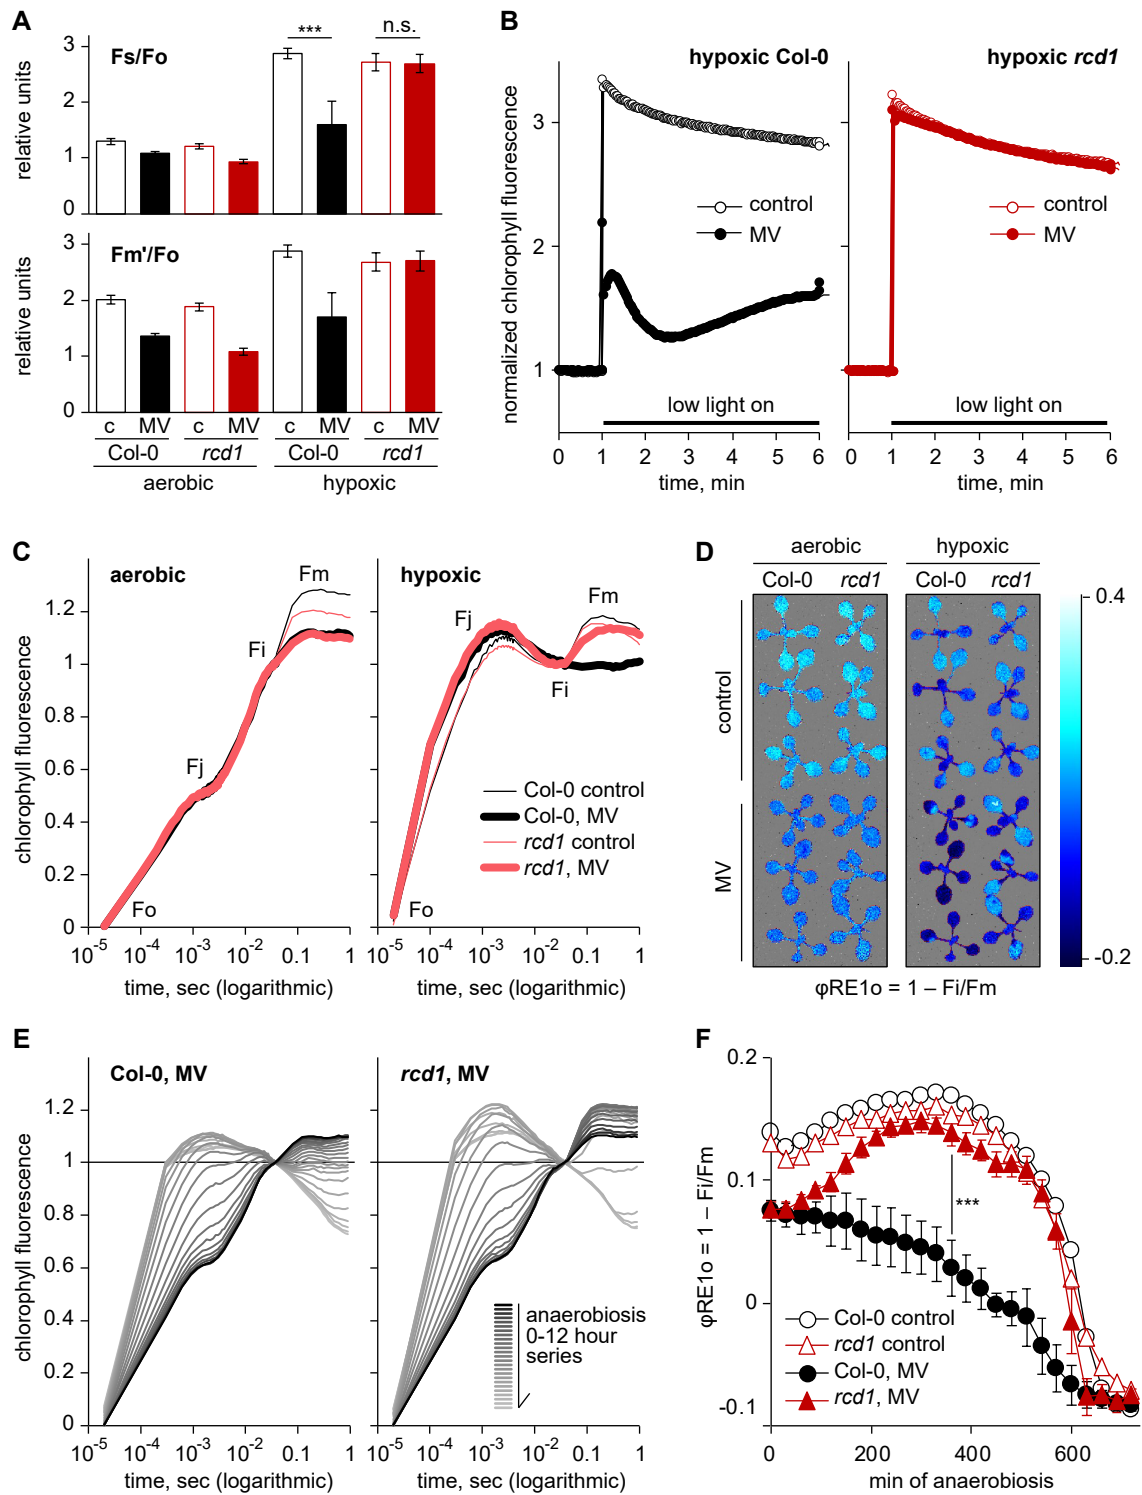

Figure 4

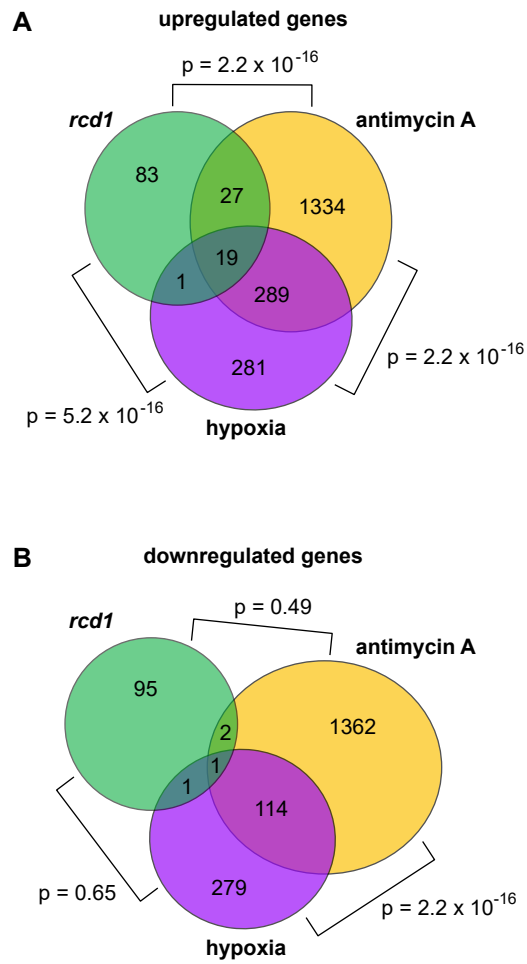

Figure 5

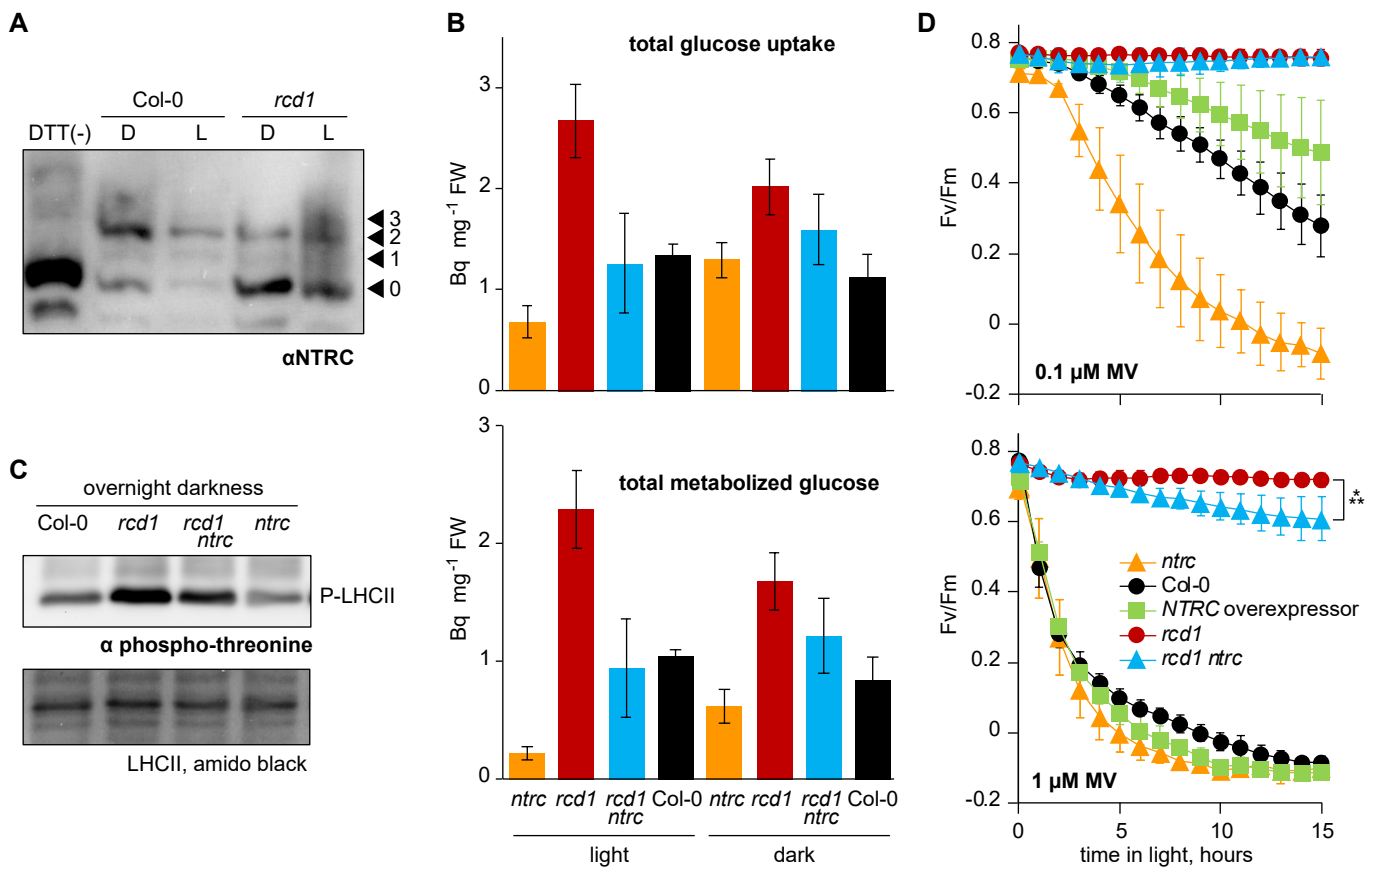

Figure 6



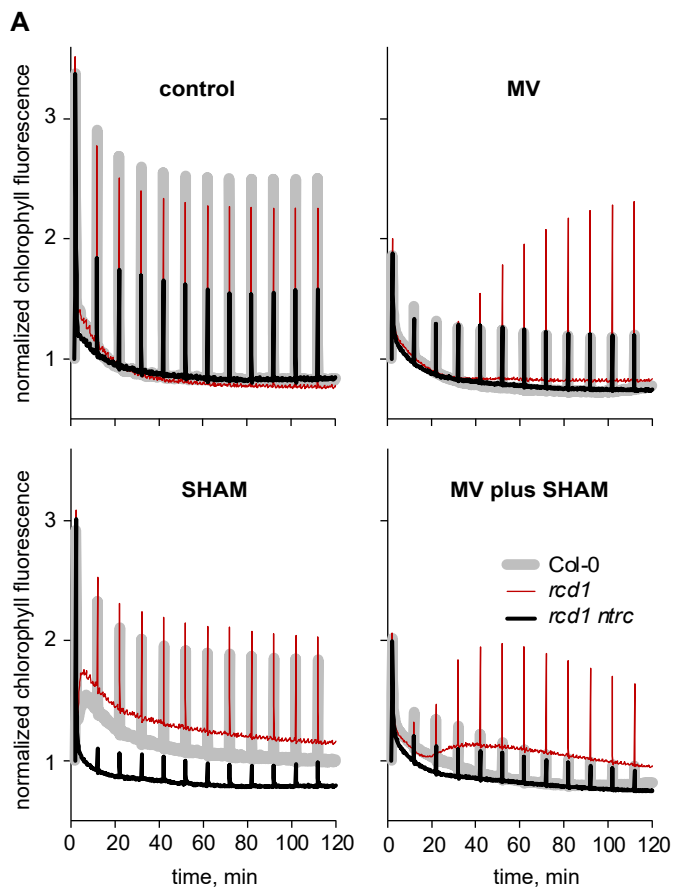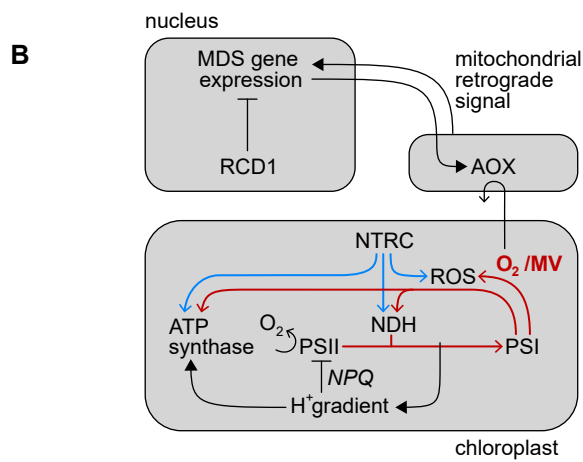

Figure 7
